# Supplementary material for: Comparative Profiling of Pseudomonas aeruginosa Strains Reveals Differential Expression of Novel Unique and Conserved Small RNAs
Source: PubMed Central journal article supplement (PMC3349714; doi:10.1371/journal.pone.0036553), 2012-05-10
Supplement: pone.0036553.s004.pdf [file pone.0036553.s004.pdf]

**Table S1.** Oligonucleotides.

| <b>Oligo Name</b>                                         | <b>Sequence (5' → 3')</b>                                           |
|-----------------------------------------------------------|---------------------------------------------------------------------|
| <i>sRNA-Seq amplicon libraries generation<sup>a</sup></i> |                                                                     |
| L1 <sup>b</sup>                                           | 5'-P-rGrCrUAGTTACTCACACTAGTGTCC/invdT                               |
| AL1                                                       | GGACACTAGTGTGAGTAACTAGC                                             |
| SMARTerII A                                               | AAGCAGTGGTATCAACGCAGAGTA                                            |
| 454forAal1MID42                                           | CGTATCGCCTCCCTCGCGCCATCAGT <u>TCGATCACGTCTAGT</u><br>GTGAGTAACTAGC  |
| 454revBsmarterIIMID42                                     | CTATGCGCCTTGCCAGCCCGCTCAGT <u>TCGATCACGTGTGGT</u><br>ATCAACGCAGAGTA |
| 454forAal1MID47                                           | CGTATCGCCTCCCTCGCGCCATCAGT <u>TGTGAGTAGTCTAGT</u><br>GTGAGTAACTAGC  |
| 454revBsmarterIIMID47                                     | CTATGCGCCTTGCCAGCCCGCTCAGT <u>TGTGAGTAGTGTGGT</u><br>ATCAACGCAGAGTA |
| <i>5S rRNA and tRNA depletion</i>                         |                                                                     |
| PA5SRNA01                                                 | GAGCTTGACGATGACCTACTCTCACATG                                        |
| PA5SRNA02                                                 | GGAGACCCACACTACCATCGGCGATG                                          |
| PA <sub>t</sub> RNA03                                     | TGGCGGAGAGGGGGGATTCTGAACCCCGA                                       |
| PA <sub>t</sub> RNA05                                     | TGGCGCACTCAGGAGGATTCTGAACCTCCGA                                     |
| PA <sub>t</sub> RNA06                                     | TGGTGGGTCGTGTAGGATTCTGAACCTACGA                                     |
| PA <sub>t</sub> RNA07                                     | TGGCGGAGAGATAGGGATTTGAACCCTAGG                                      |
| PA <sub>t</sub> RNA08                                     | TGGCGCACCCGGCAGGACTCTGAACCTGCGA                                     |
| PA <sub>t</sub> RNA09                                     | TGGGGTGGACGATGGGAATCTGAACCCACGA                                     |
| PA <sub>t</sub> RNA10                                     | TGGTGC GGACGGAGAGACTCTGAACCTCTCAC                                   |
| PA <sub>t</sub> RNA12                                     | TGGCGGAGCGGACGGGACTCTGAACCCGCGA                                     |
| PA <sub>t</sub> RNA13                                     | TGGCGGTGAGGGAGGGATTCTGAACCCCTCGA                                    |
| PA <sub>t</sub> RNA14                                     | TGGTCGGAGCGACTGGATTCTGAACCCAGCGA                                    |
| PA <sub>t</sub> RNA16                                     | TGGTGCCTCGGGAGAGACTCTGAACCTCTCAC                                    |
| PA <sub>t</sub> RNA17                                     | TGGACGTTCTGAGCGGGATTCTGAACCCGCGA                                    |
| PA <sub>t</sub> RNA18                                     | TGGCAGGGGCGGCTGGATTCTGAACCAACGC                                     |
| PA <sub>t</sub> RNA19                                     | TGGTGGCTACACCGGGACTTGAACCTGGGA                                      |
| PA <sub>t</sub> RNA21                                     | TGGTGCCAGGAGAAGACTCTGAACCTCCAC                                      |
| PA <sub>t</sub> RNA22                                     | TGGTGCCAGGGACGGAATCTGAACCCGCGA                                      |
| PA <sub>t</sub> RNA23                                     | TGGTGCCGGCACCAGGAGTCTGAACCCGGGA                                     |
| PA <sub>t</sub> RNA26                                     | GGAAGGCAGTGGGAGTCTGAACCCACCC                                        |
| PA <sub>t</sub> RNA27                                     | TGGTACCGAGGAGGGGACTCTGAACCCCTA                                      |
| PA <sub>t</sub> RNA28                                     | TGGTTGCGGGGGCTGGATTTGAACCAACGA                                      |
| PA <sub>t</sub> RNA31                                     | TGGCTCCGCGACCTGGACTCTGAACCCAGGGA                                    |
| PA <sub>t</sub> RNA32                                     | TGGTCGGGGTAGAGAGATTCTGAACCTCCCGA                                    |
| PA <sub>t</sub> RNA34                                     | TGGTGCCGGATAGAGGAATCTGAACCCCGGA                                     |
| PA <sub>t</sub> RNA35                                     | TGGTGGGTCTGGGCAGATTCTGAACCTGCCGA                                    |
| PA <sub>t</sub> RNA36                                     | TGGTGGAGCCAAGGAGGATCTGAACCTCTGA                                     |
| PA <sub>t</sub> RNA37                                     | TGGTGGAGGGAGAAGGATTCTGAACCTTCTGA                                    |
| PA <sub>t</sub> RNA38                                     | TGGAGCGGGTAGCGGGAATCTGAACCCGCGA                                     |
| PA <sub>t</sub> RNA39                                     | TGGAGCTCATGAGCGGATTTGAACCGCTGA                                      |
| PA <sub>t</sub> RNA40                                     | TGGCAGGCCAGGAGGGAATCTGAACCCCAA                                      |

| <b>Oligo Name</b>                                      | <b>Sequence (5' → 3')</b>       |
|--------------------------------------------------------|---------------------------------|
| PAiRNA41                                               | TGGCGTCCCGGAGAGGGGTCTGAACCTCCAA |
| PAiRNA46                                               | TGGTGGAGCTAGACGGGATCGAACCGTCTGA |
| PAiRNA48                                               | TGGTGGGTGATGACGGGATCGAACCGCCGA  |
| PAiRNA50                                               | TGGCGCAGCGGACGGGACTCGAACCCGCGA  |
| PAiRNA51                                               | TGGCGTCCCCTAGGGGACTCGAACCCCTGT  |
| PAiRNA54                                               | TGGTAGGCACGATTGGATTCGAACCAACGA  |
| PAiRNA55                                               | TGGTCGGGACGGAGTGATTCGAACACTCGA  |
| PAiRNA56                                               | TGGCGGAGGCGGTGAGATTCGAACCTCACGG |
| PAiRNA57                                               | TGGAGCGGGAAACGAGACTCGAACCTCGCGA |
| PAiRNA58                                               | TGGAGGCTGAGGTCGGAATCGAACCGGCGT  |
| PAiRNA59                                               | TGGTGCCCGGAGCCGGGGTCTGAACCGGCAC |
| PAiRNA60                                               | TGGTTGCGGGAGCTGGATTTGAACCAACGA  |
| PAiRNA61                                               | TGGTGGAGCCGGGGGGATTTGAACCCCGT   |
| PAiRNA62                                               | TGGAGCGGGCGAAGGGAATCGAACCCCTCG  |
| PAiRNA63                                               | TGGTGGGCCACACGGACTCGAACCGTGGA   |
| PAiRNA64                                               | TGGCGCATCCGGCGGGATTCGAACCCACGA  |
| <i>Northern blotting validation probes<sup>c</sup></i> |                                 |
| 5S                                                     | CGCCGATGGTAGTGTGGGGTC           |
| SPA0003                                                | GGCGCTTGAACACCGCTC              |
| SPA0010                                                | ACTGGAACGCCGTCAGGT              |
| SPA0011                                                | TGCCCGAGGCCGGAATCG              |
| SPA0012                                                | CAATTACCGGCGCGGTAGG             |
| SPA0013                                                | GAAGAAGCCCGCAGTAGCG             |
| SPA0014                                                | GGGTGCCGGGAGTTAAGA              |
| SPA0015                                                | TGCGATGCAATTACGCAGTTG           |
| SPA0016                                                | GGTAAGGCCGAGCTGACA              |
| SPA0017                                                | GCGCGTCGGCCGGCGT                |
| SPA0018                                                | AAAATCGGCGAAGCCACTAAAGCACT      |
| SPA0019                                                | CTGGCTAAGGGAGCGGCA              |
| SPA0023                                                | GCCCTCATCAACTCTGCCAAAGAC        |
| SPA0025                                                | TACACGGCAGTGAACACCGCGC          |
| SPA0027                                                | CCGAGCCGATCCCCTACC              |
| SPA0033                                                | AGCCGCAGGTGCAGGAAC              |
| SPA0038                                                | AAAGACCATCTGCGGGGG              |
| SPA0054                                                | CTTGCCGGAGCGGCAAGG              |
| SPA0055                                                | GCAATCCGATCAGAAAGCGC            |
| SPA0056                                                | GGCTGGCGGAGAGCGCTATC            |
| SPA0061                                                | CGGCAACATCGTCGAGAGCGAC          |
| SPA0070                                                | GCCCGGGAGCTCAGCGGA              |
| SPA0071                                                | GTAACCCTGATGGTAGAGCCC           |
| SPA0072                                                | GGTGGAGCCGGGGGATT               |
| SPA0074                                                | CGCCCGTGCCCGACGAC               |
| SPA0077                                                | CGGTCGTACTGGGTGACG              |
| SPA0078                                                | ACGCGGGCCGCAGGTGGT              |

| <b>Oligo Name</b>                                                        | <b>Sequence (5' → 3')</b>                    |
|--------------------------------------------------------------------------|----------------------------------------------|
| SPA0079                                                                  | ACCCCTCCATGCCCGTCG                           |
| SPA0080                                                                  | GGGAAAGCCCCGAGGG                             |
| SPA0081                                                                  | AGCAGCCCACCGACCCAG                           |
| SPA0084                                                                  | AGGTGCGGATCTCCGGG                            |
| SPA0085                                                                  | ATCGTCCTGATGAATCGCCTCCCT                     |
| SPA0086                                                                  | CTGACAGCAGAGGTGAGG                           |
| SPA0087                                                                  | ACATCCCTGTGTGCGGAGCA                         |
| SPA0088                                                                  | CCAGCGAGCGCGACATGG                           |
| SPA0092                                                                  | GAAGCTCCCCCCAAGTAG                           |
| SPA0096                                                                  | GGGACCACAGCGGCAACT                           |
| SPA0097                                                                  | AATCCCGGCCGCGTGGAG                           |
| SPA0100                                                                  | CCAGCCAGGCCGGCGAG                            |
| SPA0101                                                                  | CAGGATCGCGCAGGGTTG                           |
| SPA0102                                                                  | ACGGCGCATTCTGTGGACC                          |
| SPA0103                                                                  | GTACCGAGCACTGGCATCC                          |
| SPA0106                                                                  | AGCCGGCGACCGCCGTC                            |
| SPA0110                                                                  | CCCCGCGGGAGTTCGTC                            |
| SPA0111                                                                  | CGCCGCCGTAGCAGAGTC                           |
| SPA0113                                                                  | TGGAACAGGCCGAGCGTGCC                         |
| SPA0114                                                                  | CTGAACTTGCAGCTCATCACTGGG                     |
| SPA0115                                                                  | GAAGAGGGAAGAGCTCCGGCC                        |
| SPA0116                                                                  | AAATCCCGACCGCGGGG                            |
| SPA0117                                                                  | GCGGAGCCCTTGGGCTTG                           |
| SPA0119                                                                  | TCTGCGTAACGTCCAGCTGCAG                       |
| SPA0121                                                                  | ACGCAAGGCCGTCCGGCAC                          |
| SPA0122                                                                  | CCCCGAGCTTCGTATGGG                           |
| SPA0124                                                                  | GGAAAGAGTAGACCGGCGT                          |
| SPA0129                                                                  | CGAGCATGCAACGCGGGA                           |
| SPA0135                                                                  | GCCAAGGCGCAAGCCTGAA                          |
| SPA0145                                                                  | GCCGTCTGGCGCGCGGTA                           |
| SPA0146                                                                  | GGATAACCTTGTGAACAGCCC                        |
| SPA0147                                                                  | ACACACGACTCTCACGGTCG                         |
| SPA0155                                                                  | GGCGCCCACGTGACCCT                            |
| SPA0156                                                                  | GCTGATCATTCTGCGCTGGG                         |
| SPA0160                                                                  | CGGATGAGGCTTCCATGCTG                         |
| SPA0162                                                                  | GGCGAGGACGGGCGCTA                            |
| SPA0163                                                                  | TTGCTGGTGACCCTGCGC                           |
| SPA0165                                                                  | TGACCTGGTGGCTGCCTG                           |
| SPA0167                                                                  | AAGGTCGAGACAGGACAGTATC                       |
| SPA0168                                                                  | GTTCCGGCCTGTTCCATGGCCAG                      |
| SPA0174                                                                  | AGCGCTGAGGCTTGCGAC                           |
| <i>DNA templates amplification for riboprobe synthesis<sup>c,d</sup></i> |                                              |
| SPA0002F                                                                 | CCCTACGGGTTACGAGGAGCTC                       |
| SPA0002R                                                                 | <b>CTAATACGACTCACTATAGGGGGATCAACACATTTCG</b> |

| Oligo Name | Sequence (5' → 3')                             |
|------------|------------------------------------------------|
| SPA0021F   | CTCAAGAGGTTTCGGTGTTCCTCGATTTAAGGG              |
| SPA0021R   | <b>CTAATACGACTCACTATAGGG</b> CAGGAGCATCAGGCT   |
| SPA0104F   | ATCTGGCAGGTTGCCTGCCGTTTCATCCTC                 |
| SPA0104R   | <b>CTAATACGACTCACTATAGGG</b> AGTCCCCGTGTCGTG   |
| SPA0112F   | GATCGCGGGTCTTGATGCGTGGTGC                      |
| SPA0112R   | <b>CTAATACGACTCACTATAGGG</b> CCGCTTTGTGTACCT   |
| SPA0118F   | GCGCCCGTCGAGTCCGCTATTCTGC                      |
| SPA0118R   | <b>CTAATACGACTCACTATAGGG</b> GGCTCGGCTACCTGT   |
| SPA0131F   | GGACATTGCGGCAGTCTCC                            |
| SPA0131R   | <b>CTAATACGACTCACTATAGGG</b> TGGCGCTCCTCTCCGGC |
| SPA0143F   | TAGGCGCATTCTACCTATCCTTGC                       |
| SPA0143R   | <b>CTAATACGACTCACTATAGGG</b> CCTTTTCCACCATCA   |
| SPA0150F   | GATCGGGCCACCGCGCATTACC                         |
| SPA0150R   | <b>CTAATACGACTCACTATAGGG</b> AAAGCAGGCATTTCT   |
| SPA0157F   | CATGGCGCGGGTCTGGACCAGGAAG                      |
| SPA0157R   | <b>CTAATACGACTCACTATAGGG</b> CGGCGACAAGGCGCT   |

<sup>a</sup> The MID identifier sequence is underlined.

<sup>b</sup> Ribo-deoxyribo-oligonucleotide with an inverted dT at the 3'-end.

<sup>c</sup> The oligo name corresponds to the cognate nstSGR.

<sup>d</sup> The T7 RNA polymerase promoter sequence is reported in bold.
