# Supplementary material for: Comparative Profiling of Pseudomonas aeruginosa Strains Reveals Differential Expression of Novel Unique and Conserved Small RNAs
Source: PubMed Central journal article supplement (PMC3349714; doi:10.1371/journal.pone.0036553), 2012-05-10
Supplement: pone.0036553.s005.pdf [file pone.0036553.s005.pdf]

**Table S2.** Compilation of nstSGRs identified by parallel sRNA-Seq approach in the *P. aeruginosa* strains PAO1 and PA14.

| nstSGR name <sup>e</sup> | class | PAO1                             |                                             |                      |                     | PA14                             |                                             |                      |                     | Notes <sup>d</sup> |
|--------------------------|-------|----------------------------------|---------------------------------------------|----------------------|---------------------|----------------------------------|---------------------------------------------|----------------------|---------------------|--------------------|
|                          |       | Genomic coordinates (left-right) | Flanking/ Involved <i>loci</i> <sup>a</sup> | # reads <sup>b</sup> | strand <sup>c</sup> | Genomic coordinates (left-right) | Flanking/ Involved <i>loci</i> <sup>a</sup> | # reads <sup>b</sup> | strand <sup>c</sup> |                    |
| Group A                  |       |                                  |                                             |                      |                     |                                  |                                             |                      |                     |                    |
| SPA0001                  | I     | 785400-785600                    | <i>phrD</i>                                 | 95                   | +                   |                                  |                                             |                      |                     | PhrD; RGP5         |
| <b>SPA0002</b>           | I     | 2568400-2569000                  | PA2326/PA2327                               | 6                    | -                   |                                  |                                             |                      |                     |                    |
| <b>SPA0003</b>           | I     | 3087500-3087800                  | PA2729/PA2730                               | 36                   | +                   |                                  |                                             |                      |                     | RGP28              |
| SPA0004                  | III   | 501100-501300                    | PA0445                                      | 150                  | +                   |                                  |                                             |                      |                     |                    |
| SPA0005                  | III   | 2556800-2557000                  | PA2319                                      | 149                  | -                   |                                  |                                             |                      |                     |                    |
| SPA0006                  | III   | 3044700-3044900                  | PA2690                                      | 151                  | +                   |                                  |                                             |                      |                     |                    |
| SPA0007                  | III   | 3843200-3843400                  | PA3434                                      | 150                  | +                   |                                  |                                             |                      |                     |                    |
| SPA0008                  | III   | 5383800-5384000                  | PA4797                                      | 150                  | +                   |                                  |                                             |                      |                     |                    |
| SPA0066                  | III   | 4473500-4473700                  | PA3993                                      | 149                  | -                   |                                  |                                             |                      |                     |                    |
| Group B                  |       |                                  |                                             |                      |                     |                                  |                                             |                      |                     |                    |
| SPA0009                  | I     |                                  |                                             |                      |                     | 278200-278400                    | PA14_03160/PA14_03170                       | 7                    | +                   | RGP2               |
| <b>SPA0010</b>           | I     |                                  |                                             |                      |                     | 1924300-1924500                  | PA14_22090/PA14_22100                       | 6                    | -                   | RGP33              |
| <b>SPA0011</b>           | I     |                                  |                                             |                      |                     | 2677700-2678200                  | PA14_30840/ <i>trbI</i>                     | 11                   | +                   | RGP26              |
| <b>SPA0012</b>           | I     |                                  |                                             |                      |                     | 3515400-3515700                  | PA14_39480/PA14_39500                       | 152                  | +                   | RGP52              |
| <b>SPA0013</b>           | I     |                                  |                                             |                      |                     | 3974900-3975200                  | PA14_44640/PA14_44650                       | 5                    | -                   | RGP16              |
| <b>SPA0014</b>           | I     |                                  |                                             |                      |                     | 4401600-4401700                  | PA14_49480/PA14_49500                       | 8                    | +                   | RGP47              |
| <b>SPA0015</b>           | I     |                                  |                                             |                      |                     | 5355400-5355700                  | PA14_60120/PA14_60130                       | 10                   | -                   | RGP41; PAPI-1      |
| <b>SPA0016</b>           | I     |                                  |                                             |                      |                     | 6460900-6461400                  | PA14_72510/PA14_72520                       | 5                    | -                   |                    |
| <b>SPA0017</b>           | III   |                                  |                                             |                      |                     | 1315700-1316500                  | <i>trbL</i>                                 | 57                   | -                   | RGP36              |
| <b>SPA0018</b>           | III   |                                  |                                             |                      |                     | 1940100-1940300                  | PA14_22270                                  | 7                    | +                   | RGP33              |
| <b>SPA0019</b>           | III   |                                  |                                             |                      |                     | 3176100-3176300                  | PA14_35720                                  | 7                    | +                   | RGP23              |
| SPA0020                  | III   |                                  |                                             |                      |                     | 4134300-4134700                  | PA14_46460                                  | 7                    | +                   | RGP14              |
| <b>SPA0021</b>           | III   |                                  |                                             |                      |                     | 5288100-5288500                  | PA14_59370                                  | 9                    | +                   | RGP41; PAPI-1      |
| SPA0022                  | III   |                                  |                                             |                      |                     | 5303200-5303500                  | PA14_59580                                  | 5                    | -                   | RGP41; PAPI-1      |
| <b>SPA0023</b>           | III   |                                  |                                             |                      |                     | 5330700-5330900                  | PA14_59840                                  | 5                    | -                   | RGP41; PAPI-1      |
| SPA0024                  | IV    |                                  |                                             |                      |                     | 2926400-2927500                  | PA14_33290/PA14_33300                       | 3                    | +                   | RGP24; CRISPR-1    |
| <b>SPA0025</b>           | IV    |                                  |                                             |                      |                     | 2935700-2937400                  | PA14_33360                                  | 23                   | -                   | RGP24; CRISPR-2    |

| nstSGR name <sup>e</sup> | class | PAO1                             |                                             |                      |                     | PA14                             |                                             |                      |                     | Notes <sup>d</sup> |
|--------------------------|-------|----------------------------------|---------------------------------------------|----------------------|---------------------|----------------------------------|---------------------------------------------|----------------------|---------------------|--------------------|
|                          |       | Genomic coordinates (left-right) | Flanking/ Involved <i>loci</i> <sup>a</sup> | # reads <sup>b</sup> | strand <sup>c</sup> | Genomic coordinates (left-right) | Flanking/ Involved <i>loci</i> <sup>a</sup> | # reads <sup>b</sup> | strand <sup>c</sup> |                    |
| Group C                  |       |                                  |                                             |                      |                     |                                  |                                             |                      |                     |                    |
| SPA0026                  | I     | 580100-580200                    | <i>nirS/nirQ</i>                            | 3                    | -                   | 590077-590177                    | <i>nirS/nirQ</i>                            |                      |                     |                    |
| <b>SPA0027</b>           | I     | 781000-781300                    | <i>toxR/PA0708</i>                          | 11                   | +                   | 4899097-4899397                  | PA14_55150/ <i>toxR</i>                     |                      |                     |                    |
| SPA0028                  | I     | 912700-912900                    | PA0836.1                                    | 5                    | -                   | 4738703-4738903                  | PA53450                                     |                      |                     | P5                 |
| SPA0029                  | I     | 1028100-1028200                  | PA0937/PA0938                               | 6                    | +                   | 4623357-4623457                  | PA14_52130/ <i>yaiL</i>                     |                      |                     |                    |
| SPA0030                  | I     | 1097000-1097300                  | PA1013.1/PA1014                             | 5                    | -                   | 4552631-4552931                  | PA14_51220/PA14_51230                       |                      |                     |                    |
| SPA0031                  | I     | 1135200-1135400                  | PA1047/PA1048                               | 4                    | +                   | 4514530-4514730                  | PA14_50810/PA14_50820                       |                      |                     |                    |
| SPA0032                  | I     | 1251200-1251300                  | <i>nrdB/PA1156</i>                          | 5                    | -                   | 4397712-4397812                  | <i>nrdA/nrdB</i>                            |                      |                     |                    |
| <b>SPA0033</b>           | I     | 1474300-1474400                  | PA1361/PA1362                               | 4                    | -                   | 4160214-4160311                  | PA14_46670/ <i>norM</i>                     |                      |                     |                    |
| SPA0034                  | I     | 2031800-2031900                  | PA1869/PA1870                               | 4                    | +                   | 3601268-3601369                  | PA14_40300/PA14_40310                       |                      |                     |                    |
| SPA0035                  | I     | 2330400-2330600                  | <i>ada/PA2119</i>                           | 5                    | -                   | 3312492-3312692                  | PA14_37170 / <i>ada</i>                     |                      |                     |                    |
| SPA0036                  | I     | 2558300-2558900                  | PA2319/ <i>gntR</i>                         | 2                    | -                   | 3078836-3079153                  | <i>gntR/PA14_34670</i>                      |                      |                     |                    |
| SPA0037                  | I     | 2614800-2614900                  | PA2364/PA2365                               | 7                    | +                   | 3029702-3029801                  | PA14_34070/PA14_34080                       |                      |                     |                    |
| <b>SPA0038</b>           | I     | 3116400-3116600                  | PA2754/ <i>eco</i>                          | 11                   | +                   | 2457373-2457573                  | <i>eco/PA14_28486</i>                       |                      |                     |                    |
| SPA0039                  | I     | 3261300-3261400                  | PA2906/ <i>cobI</i>                         | 4                    | -                   | 2307957-2308057                  | <i>cobL/PA14_26485</i>                      |                      |                     |                    |
| SPA0040                  | I     | 3489900-3490100                  | <i>purF/PA3109</i>                          | 4                    | -                   | 2078190-2078390                  | <i>cvpA/purF</i>                            |                      |                     |                    |
| SPA0041                  | I     | 4094900-4095000                  | <i>rpsB/map</i>                             | 3                    | -                   | 1463019-1463119                  | <i>map/rpsB</i>                             |                      |                     |                    |
| SPA0042                  | I     | 4780700-4780900                  | PA4270.1                                    | 4                    | -                   | 745920-746120                    | <i>rplL/rpoB</i>                            |                      |                     | P26                |
| SPA0043                  | I     | 5121600-5121800                  | PA4573/PA4574                               | 4                    | -                   | 5394065-5394265                  | PA14_60520/PA14_60530                       |                      |                     |                    |
| SPA0044                  | I     | 5325500-5325700                  | <i>pnp/rps0</i>                             | 8                    | -                   | 5597429-5597629                  | <i>rps0/pnp</i>                             |                      |                     |                    |
| SPA0045                  | I     | 5344900-5345100                  | PA4758.1                                    | 5                    | -                   | 5616829-5617029                  | <i>carA/dapB</i>                            |                      |                     | P32                |
| SPA0046                  | I     | 5439800-5439900                  | PA4844/ <i>dipZ</i>                         | 5                    | +                   | 5710452-5710552                  | <i>ctpL/dipZ</i>                            |                      |                     |                    |
| SPA0047                  | I     | 6110800-6111000                  | <i>aspA/PA5430</i>                          | 5                    | -                   | 6383723-6383923                  | <i>aspA/PA14_71670</i>                      |                      |                     |                    |
| SPA0048                  | II    | 990900-991100                    | <i>rsmA</i>                                 | 4                    | +                   | 4660491-4660691                  | <i>rsmA</i>                                 |                      |                     |                    |
| SPA0049                  | II    | 1182800-1183100                  | <i>fliC</i>                                 | 5                    | +                   | 4466831-4467131                  | <i>fliC</i>                                 |                      |                     |                    |
| SPA0050                  | II    | 3762700-3763000                  | <i>flgM</i>                                 | 6                    | +                   | 1784235-1784535                  | <i>flgM</i>                                 |                      |                     |                    |
| SPA0051                  | II    | 5337600-5337800                  | <i>ftsH</i>                                 | 5                    | -                   | 5609529-5609729                  | <i>ftsH</i>                                 |                      |                     |                    |
| SPA0052                  | II    | 5522100-5522300                  | <i>azu</i>                                  | 6                    | -                   | 5792869-5793769                  | <i>azu</i>                                  |                      |                     |                    |
| SPA0053                  | II    | 5813600-5813800                  | PA5165                                      | 4                    | +                   | 6085771-6085971                  | PA14_68230                                  |                      |                     |                    |
| <b>SPA0054</b>           | III   | 176100-176200                    | <i>pcaG</i>                                 | 15                   | -                   | 174851-175160                    | <i>pcaG</i>                                 |                      |                     |                    |

| nstSGR name <sup>e</sup> | class | PAO1                             |                                             |                      |                     | PA14                             |                                             |                      |                     | Notes <sup>d</sup> |
|--------------------------|-------|----------------------------------|---------------------------------------------|----------------------|---------------------|----------------------------------|---------------------------------------------|----------------------|---------------------|--------------------|
|                          |       | Genomic coordinates (left-right) | Flanking/ Involved <i>loci</i> <sup>a</sup> | # reads <sup>b</sup> | strand <sup>c</sup> | Genomic coordinates (left-right) | Flanking/ Involved <i>loci</i> <sup>a</sup> | # reads <sup>b</sup> | strand <sup>c</sup> |                    |
| SPA0055                  | III   | 719900-720200                    | PA0667                                      | 8                    | +                   | 730790-731290                    | PA14_08540/ <i>tyrZ</i>                     |                      |                     |                    |
| SPA0056                  | III   | 781400-782200                    | PA0708                                      | 14                   | +                   | 4898197-4898997                  | PA14_55150                                  |                      |                     |                    |
| SPA0057                  | III   | 782900-783600                    | PA0711                                      | 7                    | +                   | 4896798-4897497                  | PA14_55117                                  |                      |                     |                    |
| SPA0058                  | III   | 1027800-1028000                  | PA0937                                      | 4                    | -                   | 4623557-4623757                  | <i>yaiL</i>                                 |                      |                     |                    |
| SPA0059                  | III   | 2113600-2114100                  | PA1933                                      | 5                    | -                   | 3518295-3518795                  | PA14_39520                                  |                      |                     |                    |
| SPA0060                  | III   | 3348400-3348700                  | PA2990                                      | 4                    | -                   | 2220645-2220945                  | <i>ugpQ</i>                                 |                      |                     |                    |
| SPA0061                  | III   | 3349200-3349400                  | <i>sth</i>                                  | 8                    | +                   | 2219945-2220145                  | <i>sth</i>                                  |                      |                     |                    |
| SPA0062                  | III   | 3570600-3570800                  | PA3180                                      | 2                    | -                   | 2003152-2003352                  | <i>mutT</i>                                 |                      |                     |                    |
| SPA0063                  | III   | 3617500-3617600                  | PA3230                                      | 4                    | +                   | 1951512-1951612                  | PA14_22410                                  |                      |                     |                    |
| SPA0064                  | III   | 3865900-3866200                  | PA3459                                      | 4                    | -                   | 1674746-1675046                  | <i>asnB</i>                                 |                      |                     |                    |
| SPA0065                  | III   | 4245900-4246100                  | PA3788                                      | 4                    | -                   | 1280381-1280581                  | PA14_15090                                  |                      |                     |                    |
| SPA0067                  | III   | 5676000-5676200                  | <i>pilQ</i>                                 | 4                    | +                   | 5947414-5947580                  | <i>pilQ</i>                                 |                      |                     |                    |
| Group D                  |       |                                  |                                             |                      |                     |                                  |                                             |                      |                     |                    |
| SPA0068                  | I     | 332900-333100                    | PA0295/ <i>spul</i>                         | 6                    | -                   | 347000-347200                    | PA14_03855/PA14_03860                       | 4                    | -                   |                    |
| SPA0069                  | I     | 586800-587000                    | <i>rsmY</i>                                 | 205                  | +                   | 596800-597000                    | <i>rsmY</i>                                 | 99                   | +                   | RsmY               |
| SPA0070                  | I     | 706700-706900                    | <i>vfr</i> /PA0653                          | 12                   | -                   | 717700-717800                    | <i>vfr</i> /PA14_08380                      | 4                    | -                   |                    |
| SPA0071                  | I     | 883400-883600                    | PA0805/PA0806                               | 5                    | -                   | 4773800-4773900                  | PA14_53830/PA14_53840                       | 5                    | +                   |                    |
| SPA0072                  | I     | 901500-901900                    | <i>ssrA</i>                                 | 1643                 | -                   | 4749700-4750100                  | PA14_53560/PA14_53570                       | 1595                 | +                   | tmRNA              |
| SPA0073                  | I     | 1205000-1205100                  | PA1112.1                                    | 4                    | -                   | 4444700-4445000                  | PA14_49990/PA14_50000                       | 7                    | +                   | sRNA645            |
| SPA0074                  | I     | 1557900-1558200                  | PA1429/ <i>lasR</i>                         | 6                    | +                   | 4086100-4086300                  | <i>lasR</i> /PA14_45970                     | 8                    | -                   |                    |
| SPA0075                  | I     | 1668800-1669200                  | <i>ffs</i>                                  | 862                  |                     | 3974500-3974700                  | PA14_44640/PA14_44650                       | 500                  | -                   | 4.5S               |
| SPA0076 <sup>f</sup>     | I     |                                  |                                             |                      |                     | 3975600-3975800                  | PA14_44640/PA14_44650                       | 555                  | -                   | 4.5S               |
| SPA0077                  | I     | 2473000-2473100                  | <i>bkdR/bkdA1</i>                           | 8                    | +                   | 3159700-3159900                  | <i>bkdA1/bkdR</i>                           | 8                    | -                   |                    |
| SPA0078                  | I     | 2705600-2705800                  | PA2421/PA2422                               | 6                    | -                   | 2937800-2937900                  | PA14_33370/PA14_33380                       | 7                    | +                   |                    |
| SPA0079                  | I     | 3123200-3123500                  | PA2763/PA2764                               | 1893                 | -                   | 2450500-2450700                  | PA14_28350/PA14_28360                       | 2982                 | +                   |                    |
| SPA0080                  | I     | 3147500-3147600                  | PA2789/PA2790                               | 7                    | +                   | 2426600-2426800                  | PA14_28030/PA14_28040                       | 25                   | -                   |                    |
| SPA0081                  | I     | 3442300-3442500                  | PA3069/PA3070                               | 5                    | -                   | 2129000-2129100                  | <i>moxR</i> /PA14_24440                     | 5                    | +                   |                    |
| SPA0082                  | I     | 3705300-3705600                  | <i>phrS</i>                                 | 80                   | -                   | 1841700-1842000                  | PA14_21260                                  | 120                  | +                   | PhrS; P20          |
| SPA0083                  | I     | 3778000-3778200                  | <i>amiL</i>                                 | 28                   | -                   | 1768500-1768600                  | PA14_20550/ <i>amiE</i>                     | 3                    | +                   | AmiL               |
| SPA0084                  | I     | 3958000-3958200                  | PA3535/PA3536                               | 14                   | +                   | 1599900-1600100                  | PA14_18620/PA14_18630                       | 36                   | -                   |                    |

| nstSGR name <sup>e</sup> | class             | PAO1                             |                                             |                      |                     | PA14                             |                                             |                      |                     | Notes <sup>d</sup> |
|--------------------------|-------------------|----------------------------------|---------------------------------------------|----------------------|---------------------|----------------------------------|---------------------------------------------|----------------------|---------------------|--------------------|
|                          |                   | Genomic coordinates (left-right) | Flanking/ Involved <i>loci</i> <sup>a</sup> | # reads <sup>b</sup> | strand <sup>c</sup> | Genomic coordinates (left-right) | Flanking/ Involved <i>loci</i> <sup>a</sup> | # reads <sup>b</sup> | strand <sup>c</sup> |                    |
| SPA0085                  | I                 | 4057500-4057700                  | <i>rsmZ</i>                                 | 3494                 | -                   | 1500300-1500500                  | <i>rpoS/fdxA</i>                            | 8491                 | +                   | RsmZ               |
| SPA0086                  | I                 | 4388800-4389000                  | PA3919/PA1920                               | 11                   | -                   | 1135100-1135500                  | PA14_13170/PA14_13190                       | 7                    | +                   |                    |
| SPA0087                  | I                 | 4514400-4514700                  | PA4033/ <i>aqpZ</i>                         | 10                   | +                   | 1011600-1011900                  | <i>aqpZ</i> /PA14_11670                     | 20                   | -                   |                    |
| SPA0088                  | I                 | 4519000-4519100                  | PA4036/PA4037                               | 4                    | -                   | 1007000-1007300                  | PA14_11620/PA14_11630                       | 4                    | +                   |                    |
| SPA0089                  | I                 | 4536600-4536900                  | <i>ribC/ribD</i>                            | 9                    | -                   | 989600-989800                    | <i>ribD/ribC</i>                            | 4                    | +                   | sRNA2315           |
| SPA0090                  | I                 | 4939100-4939300                  | PA4406.1                                    | 10                   | -                   | 5102700-5102900                  | <i>lpxC/ftsZ</i>                            | 3                    | -                   | 72/101             |
| SPA0091                  | I                 | 4956300-4956700                  | <i>rnpB</i>                                 | 340                  | -                   | 5119800-5120100                  | PA14_57460/PA14_57470                       | 630                  | -                   | RnpB; sRNA2510     |
| SPA0092                  | I                 | 5308500-5309000                  | <i>crcZ</i>                                 | 100                  | +                   | 5580500-5581300                  | <i>cbrB/pcnB</i>                            | 120                  | +                   | CrcZ               |
| SPA0093                  | I                 | 5372500-5372600                  | PA4784/PA4785                               | 10                   | -                   | 5644200-5644400                  | PA14_63240/ <i>yfcY</i>                     | 4                    | -                   |                    |
| SPA0094                  | I                 | 5884300-5884600                  | <i>ssrS</i>                                 | 898                  | +                   | 6156500-6156800                  | PA14_69030/PA14_69040                       | 767                  | +                   | 6S                 |
| SPA0095                  | I(PAO1)/III(PA14) | 1997000-1997400                  | <i>cysI</i> /PA1839                         | 8                    | +                   | 3637200-3637500                  | PA14_40740                                  | 5                    | -                   | sRNA1059           |
| SPA0096                  | I(PAO1)/V(PA14)   | 3114100-3114200                  | PA2751/PA2752                               | 11                   | -                   | 2459700-2460900                  | PA14_28520                                  | 41                   | +                   |                    |
| SPA0097                  | I(PAO1)/V(PA14)   | 3129600-3129700                  | PA2771/PA2770                               | 15                   | +                   | 2444300-2444400                  | PA14_28250                                  | 78                   | -                   | RGP43              |
| SPA0098                  | II                | 410900-411500                    | PA0367                                      | 4                    | +                   | 425649-426248                    | PA14_04820                                  | 3                    | +                   |                    |
| SPA0099                  | II                | 564700-564900                    | PA0506                                      | 3                    | +                   | 574700-575000                    | PA14_06600                                  | 6                    | +                   |                    |
| SPA0100                  | II                | 648600-649000                    | PA0588                                      | 9                    | -                   | 661400-661700                    | <i>prkA</i>                                 | 12                   | -                   |                    |
| SPA0101                  | II                | 1348400-1348600                  | PA1244                                      | 8                    | -                   | 4286000-4286200                  | PA14_48150                                  | 7                    | +                   |                    |
| SPA0102                  | II                | 3549800-3550100                  | <i>rpsA</i>                                 | 8                    | -                   | 2024000-2024200                  | <i>rpsA</i>                                 | 5                    | +                   |                    |
| SPA0103                  | II                | 3616900-3617100                  | PA3229                                      | 59                   | +                   | 1951900-1952200                  | PA14_22420                                  | 3                    | -                   |                    |
| SPA0104                  | II                | 3889700-3899900                  | <i>rhII</i>                                 | 33                   | -                   | 1651700-1651900                  | <i>rhII</i>                                 | 70                   | +                   |                    |
| SPA0105                  | II                | 3892800-3893300                  | <i>rhIA</i>                                 | 6                    | -                   | 1648400-1649100                  | <i>rhIA</i>                                 | 17                   | +                   |                    |
| SPA0106                  | II                | 4622700-4622800                  | PA4133                                      | 11                   | +                   | 904900-905200                    | <i>ccoN</i>                                 | 4                    | -                   |                    |
| SPA0107                  | II                | 5067700-5067900                  | PA4523                                      | 4                    | -                   | 5231400-5231600                  | PA14_58690                                  | 3                    | -                   |                    |
| SPA0108                  | II                | 5165800-5166000                  | PA4606                                      | 2                    | -                   | 5438300-5438500                  | PA14_60960                                  | 2                    | +                   |                    |
| SPA0109                  | II                | 5952700-5952900                  | <i>glnK</i>                                 | 9                    | -                   | 6226000-6226100                  | <i>glnK</i>                                 | 13                   | -                   |                    |
| SPA0110                  | II                | 6162000-6162300                  | PA5473                                      | 3                    | +                   | 6434900-6435100                  | PA14_72230                                  | 6                    | +                   |                    |
| SPA0111                  | III               | 182500-182700                    | <i>triC</i>                                 | 12                   | -                   | 181400-181600                    | Pa14_01970                                  | 7                    | -                   |                    |
| SPA0112                  | III               | 410900-411500                    | PA0367                                      | 2                    | -                   | 425649-426248                    | PA14_04820                                  | 5                    | -                   |                    |
| SPA0113                  | III               | 449000-449400                    | <i>gshB</i>                                 | 9                    | +                   | 463700-464100                    | <i>gshB</i>                                 | 34                   | +                   |                    |
| SPA0114                  | III               | 2982700-2982900                  | <i>nuoA</i>                                 | 3                    | -                   | 2599000-2599200                  | <i>nuoA</i>                                 | 11                   | +                   |                    |

| nstSGR name <sup>e</sup> | class | PAO1                             |                                             |                      |                     | PA14                             |                                             |                      |                     | Notes <sup>d</sup> |
|--------------------------|-------|----------------------------------|---------------------------------------------|----------------------|---------------------|----------------------------------|---------------------------------------------|----------------------|---------------------|--------------------|
|                          |       | Genomic coordinates (left-right) | Flanking/ Involved <i>loci</i> <sup>a</sup> | # reads <sup>b</sup> | strand <sup>c</sup> | Genomic coordinates (left-right) | Flanking/ Involved <i>loci</i> <sup>a</sup> | # reads <sup>b</sup> | strand <sup>c</sup> |                    |
| SPA0115                  | III   | 3119200-3119700                  | PA2759                                      | 33                   | +                   | 2454200-2454800                  | PA14_28410                                  | 88                   | -                   |                    |
| SPA0116                  | III   | 3127700-3127900                  | PA2769                                      | 20                   | +                   | 2446100-2446200                  | PA14_28290                                  | 89                   | -                   |                    |
| SPA0117                  | III   | 3414600-3414800                  | <i>pyrD</i>                                 | 5                    | +                   | 2154400-2154700                  | <i>pyrD</i>                                 | 8                    | -                   |                    |
| SPA0118                  | III   | 3761800-3762100                  | PA3350                                      | 14                   | -                   | 1785200-1785400                  | <i>flgA</i>                                 | 5                    | +                   |                    |
| SPA0119                  | III   | 5680700-5681300                  | <i>ponA</i>                                 | 27                   | -                   | 5951200-5952700                  | <i>ponA</i>                                 | 11                   | -                   |                    |
| SPA0120                  | III   | 6135900-6136000                  | <i>wbpZ</i>                                 | 5                    | +                   | 6408800-6409000                  | <i>wbpZ</i>                                 | 9                    | +                   |                    |
| SPA0121                  | III   | 6171700-6172000                  | PA5480                                      | 14                   | -                   | 6444600-6445100                  | PA14_72350                                  | 4                    | -                   |                    |
| SPA0122                  | III   | 6183500-6183700                  | PA5492                                      | 36                   | -                   | 6456400-6456600                  | <i>engB</i>                                 | 73                   | -                   |                    |
| SPA0123                  | V     | 784000-784500                    | PA0713                                      | 17                   | +                   | 4895600-4896200                  | PA14_55110                                  | 12                   | -                   |                    |
| SPA0124                  | V     | 1538600-1539000                  | PA1414                                      | 44                   | +                   | 4105200-4105600                  | PA14_46160                                  | 197                  | -                   |                    |
| SPA0125                  | V     | 3108800-3109300                  | PA2747                                      | 9                    | -                   | 2464700-2465200                  | PA_28600                                    | 12                   | +                   |                    |
| SPA0126                  | V     | 3710200-3710700                  | PA3309                                      | 14                   | +                   | 1836400-1836900                  | PA14_21220                                  | 10                   | -                   |                    |
| SPA0127                  | V     | 5544700-5545000                  | PA4940                                      | 4                    | -                   | 5816100-5816300                  | PA14_65260                                  | 4                    | -                   |                    |
| Group E                  |       |                                  |                                             |                      |                     |                                  |                                             |                      |                     |                    |
| SPA0128                  | I     | 99747-100047                     | <i>tha1/tssA1</i>                           |                      |                     | 97400-97700                      | PA14_00980/PA14_00990                       | 3                    | -                   |                    |
| SPA0129                  | I     | 517688-518088                    | PA0458/PA0459                               |                      |                     | 530600-531100                    | <i>emrA/clpA</i>                            | 4                    | +                   |                    |
| SPA0130                  | I     | 674110-674210                    | PA0611/PA0612                               |                      |                     | 686800-686900                    | <i>prtR/PA14_07970</i>                      | 3                    | +                   |                    |
| SPA0131                  | I     | 3813773-3813973                  | <i>hasAp/hasD</i>                           |                      |                     | 1725300-1725500                  | <i>hasAP/hasD</i>                           | 5                    | -                   |                    |
| SPA0132                  | I     | 3498188-3498388                  | <i>fimV/PA3116</i>                          |                      |                     | 2069900-2070100                  | PA14_23810/ <i>fimV</i>                     | 6                    | +                   |                    |
| SPA0133                  | I     | 3221081-3221181                  | PA2867/PA2868                               |                      |                     | 2348200-2348300                  | PA14_26990 PA14_27000                       | 3                    | -                   |                    |
| SPA0134                  | I     | 2966810-2967110                  | <i>icd/idh</i>                              |                      |                     | 2614800-2615100                  | <i>idh/icd</i>                              | 7                    | -                   |                    |
| SPA0135                  | I     | 2893791-2894091                  | PA2559/PA2560                               |                      |                     | 2733300-2733600                  | PA14_31430/PA14_31440                       | 3                    | +                   |                    |
| SPA0136                  | I     | 2341596-2341796                  | PA2127/ <i>cupA1</i>                        |                      |                     | 3301600-3301800                  | PA14_37060/PA14_37070                       | 4                    | +                   |                    |
| SPA0137                  | I     | 1720609-1720709                  | <i>gltA/sdhC</i>                            |                      |                     | 3922800-3922900                  | <i>sdhC/gltA</i>                            | 4                    | -                   |                    |
| SPA0138                  | I     | 1163027-1163327                  | <i>braC</i>                                 |                      |                     | 4486600-4486900                  | <i>braC</i>                                 | 5                    | +                   |                    |
| SPA0139                  | I     | 5282368-5282768                  | PA4702/PA4703                               |                      |                     | 5554300-5554700                  | PA14_62250/PA14_62240                       | 8                    | +                   |                    |
| SPA0140                  | II    | 8500-8700                        | PA0007                                      |                      |                     | 8500-8700                        | PA14_00080                                  | 7                    | +                   |                    |
| SPA0141                  | II    | 40479-40679                      | PA0039                                      |                      |                     | 40500-40700                      | PA14_00480                                  | 4                    | +                   |                    |
| SPA0142                  | II    | 141786-142186                    | PA0122                                      |                      |                     | 139700-140100                    | PA14_01490                                  | 17                   | +                   |                    |
| SPA0143                  | II    | 437564-437864                    | <i>pilU</i>                                 |                      |                     | 452300-452600                    | <i>pilU</i>                                 | 6                    | +                   |                    |

| nstSGR name <sup>e</sup> | class | PAO1                             |                                             |                      |                     | PA14                             |                                             |                      |                     | Notes <sup>d</sup> |
|--------------------------|-------|----------------------------------|---------------------------------------------|----------------------|---------------------|----------------------------------|---------------------------------------------|----------------------|---------------------|--------------------|
|                          |       | Genomic coordinates (left-right) | Flanking/ Involved <i>loci</i> <sup>a</sup> | # reads <sup>b</sup> | strand <sup>c</sup> | Genomic coordinates (left-right) | Flanking/ Involved <i>loci</i> <sup>a</sup> | # reads <sup>b</sup> | strand <sup>c</sup> |                    |
| SPA0144                  | II    | 4507749-4507948                  | PA4026                                      |                      |                     | 1018300-1018500                  | PA14_11750                                  | 3                    | -                   |                    |
| <b>SPA0145</b>           | II    | 3772836-3773036                  | <i>lecB</i>                                 |                      |                     | 1774200-1774400                  | <i>lecB</i>                                 | 6                    | -                   |                    |
| <b>SPA0146</b>           | II    | 3649323-3649523                  | PA3261/PA3262                               |                      |                     | 1897700-1897000                  | PA14_21830                                  | 4                    | +                   |                    |
| <b>SPA0147</b>           | II    | 3332328-3332928                  | <i>rne</i>                                  |                      |                     | 2236400-2237000                  | <i>rne</i>                                  | 10                   | -                   |                    |
| SPA0148                  | II    | 2926236-2926636                  | <i>gacA</i>                                 |                      |                     | 2655300-2655700                  | <i>gacA</i>                                 | 4                    | +                   |                    |
| SPA0149                  | II    | 2059117-2059417                  | PA1888                                      |                      |                     | 3573000-3573300                  | PA14_40100                                  | 5                    | +                   |                    |
| <b>SPA0150</b>           | II    | 1703023-1703223                  | <i>acnA</i>                                 |                      |                     | 3940300-3940500                  | <i>acnA</i>                                 | 5                    | +                   |                    |
| SPA0151                  | II    | 1226131-1226232                  | PA1134                                      |                      |                     | 4423700-4423800                  | PA14_49720                                  | 4                    | +                   |                    |
| SPA0152                  | II    | 0939003-940203                   | PA0861                                      |                      |                     | 4711400-4711600                  | PA14_53140                                  | 4                    | -                   |                    |
| SPA0153                  | II    | 5755147-5756347                  | <i>estA</i>                                 |                      |                     | 6028400-6028600                  | <i>estA</i>                                 | 5                    | -                   |                    |
| SPA0154                  | II    | 6106977-6107377                  | <i>adhA</i>                                 |                      |                     | 6379900-6380300                  | <i>adhA</i>                                 | 8                    | +                   |                    |
| <b>SPA0155</b>           | III   | 131185-131585                    | <i>collI</i>                                |                      |                     | 129100-129500                    | <i>collI</i>                                | 4                    | -                   |                    |
| <b>SPA0156</b>           | III   | 334675-334975                    | <i>spuA</i>                                 |                      |                     | 348800-349100                    | <i>spuA</i>                                 | 6                    | -                   |                    |
| <b>SPA0157</b>           | III   | 380028-380328                    | <i>ptsP</i>                                 |                      |                     | 394200-394500                    | <i>ptsP</i>                                 | 3                    | -                   |                    |
| SPA0158                  | III   | 4751619-4751918                  | <i>bfrA</i>                                 |                      |                     | 774900-775200                    | <i>bfrA</i>                                 | 6                    | -                   |                    |
| SPA0159                  | III   | 4005030-4005330                  | PA3573                                      |                      |                     | 1552800-1553100                  | PA14_18090                                  | 11                   | -                   |                    |
| <b>SPA0160</b>           | III   | 3501188-3500688                  | <i>leuB</i>                                 |                      |                     | 2067200-2067500                  | <i>leuB</i>                                 | 3                    | -                   |                    |
| <b>SPA0162</b>           | III   | 2911211-2910811                  | <i>alkB1</i>                                |                      |                     | 2672600-2672800                  | <i>alkB1</i>                                | 3                    | -                   |                    |
| <b>SPA0163</b>           | III   | 2818447-2818747                  | PA2500                                      |                      |                     | 2808600-2808900                  | PA14_32330                                  | 3                    | +                   |                    |
| SPA0164                  | III   | 1996877-1997277                  | PA1838/PA1839                               |                      |                     | 3637400-3637800                  | PA14_40750                                  | 5                    | +                   |                    |
| <b>SPA0165</b>           | III   | 1878304-1878604                  | PA1735                                      |                      |                     | 3756200-3756500                  | PA14_42100                                  | 4                    | +                   |                    |
| SPA0166                  | III   | 1558629-1558929                  | <i>lasR</i>                                 |                      |                     | 4085300-4085600                  | <i>lasR</i>                                 | 10                   | +                   |                    |
| <b>SPA0167</b>           | III   | 1265312-1264912                  | PA1166/ <i>pcpS</i>                         |                      |                     | 4383800-4384000                  | PA14_49330/ <i>pcpS</i>                     | 3                    | -                   |                    |
| <b>SPA0168</b>           | III   | 1096531-1096631                  | <i>purC</i>                                 |                      |                     | 4553300-4553400                  | <i>purC</i>                                 | 40                   | +                   |                    |
| SPA0169                  | III   | 1068967-1069257                  | PA0987                                      |                      |                     | 4583200-4583500                  | PA14_51540                                  | 5                    | +                   | RGP7               |
| SPA0170                  | III   | 5001909-5002309                  | PA4473                                      |                      |                     | 5165500-5165900                  | PA14_58060                                  | 4                    | -                   |                    |
| SPA0171                  | III   | 5301669-5301869                  | PA4722                                      |                      |                     | 5573600-5573800                  | <i>aspC</i>                                 | 4                    | +                   |                    |
| SPA0172                  | III   | 5868087-5868387                  | PA5212/ <i>gcvP</i>                         |                      |                     | 6140300-6140600                  | PA14_68840/ <i>gcvP1</i>                    | 7                    | +                   |                    |
| SPA0173                  | III   | 5885587-5885887                  | PA5229                                      |                      |                     | 6157800-6158100                  | PA14_69050                                  | 6                    | -                   |                    |
| <b>SPA0174</b>           | III   | 5925886-5926066                  | <i>argH</i>                                 |                      |                     | 6198100-6198300                  | <i>argH</i>                                 | 3                    | -                   |                    |

| nstSGR name <sup>e</sup> | class | PAO1                             |                                             |                      |                     | PA14                             |                                             |                      |                     | Notes <sup>d</sup> |
|--------------------------|-------|----------------------------------|---------------------------------------------|----------------------|---------------------|----------------------------------|---------------------------------------------|----------------------|---------------------|--------------------|
|                          |       | Genomic coordinates (left-right) | Flanking/ Involved <i>loci</i> <sup>a</sup> | # reads <sup>b</sup> | strand <sup>c</sup> | Genomic coordinates (left-right) | Flanking/ Involved <i>loci</i> <sup>a</sup> | # reads <sup>b</sup> | strand <sup>c</sup> |                    |
| SPA0175                  | III   | 5995982-5996181                  | PA5325                                      |                      |                     | 6268900-6269100                  | PA14_70300                                  | 4                    | -                   |                    |
| SPA0176                  | III   | 6176689-6176989                  | <i>ampDH2</i>                               |                      |                     | 6449600-6449900                  | PA14_72400                                  | 4                    | +                   |                    |
| SPA0177                  | III   | 6218466-6218866                  | PA5525                                      |                      |                     | 6491700-6492100                  | PA14_72890                                  | 11                   | -                   |                    |
| SPA0178                  | V     | 4632556-4632856                  | PA4141                                      |                      |                     | 895000-895300                    | PA14_10360                                  | 15                   | -                   |                    |
| SPA0179                  | V     | 3235659-3236359                  | PA2883                                      |                      |                     | 2333200-2333600                  | PA14_26780                                  | 12                   | -                   |                    |
| SPA0181                  | V     | 3108471-3108771                  | PA2746/PA2747                               |                      |                     | 2465200-2465500                  | PA14_28610                                  | 5                    | -                   |                    |
| SPA0182                  | V     | 1064311-1064707                  | PA0981/PA0982                               |                      |                     | 4585500-4585900                  | PA14_51570                                  | 6                    | -                   | RGP7               |
| SPA0184                  | V     | 5169142-5169442                  | PA4611                                      |                      |                     | 5441600-5441900                  | PA14_61010                                  | 7                    | -                   |                    |

<sup>a</sup> *Loci* (locus ID or gene name) either overlapping (class II, III and V) or flanking (class I) the nstSGRs.

<sup>b</sup> Total number of cDNA reads identifying the nstSGR.

<sup>c</sup> Upper (+) or lower (-) genomic DNA strand coincident with cDNA reads.

<sup>d</sup> Names of annotated *P. aeruginosa* sRNAs; Region of Genomic Plasticity (RPG) containing the nstSGR.

<sup>e</sup> Tested sRNAs are in boldface.

<sup>f</sup> In PA14 this nstSGR contains a duplication of *ffs* gene for 4.5S between *loci* PA14\_44640 and PA14\_44650.
