# Supplementary material for: Comparative Profiling of Pseudomonas aeruginosa Strains Reveals Differential Expression of Novel Unique and Conserved Small RNAs
Source: PubMed Central journal article supplement (PMC3349714; doi:10.1371/journal.pone.0036553), 2012-05-10
Supplement: pone.0036553.s006.pdf [file pone.0036553.s006.pdf]

**Table S3.** Previously identified *P. aeruginosa* sRNAs found in this work.

|                      |                |                        | PAO1                 | PA14                 |
|----------------------|----------------|------------------------|----------------------|----------------------|
| nstSGR name          | sRNA name      | Reference <sup>c</sup> | # reads <sup>a</sup> | # reads <sup>a</sup> |
| Group A              |                |                        |                      |                      |
| SPA0001              | PhrD           | [19]                   | 95                   | -                    |
| Group C              |                |                        |                      |                      |
| SPA0028              | P5             | [17]                   | 5                    | -                    |
| SPA0042              | P26            | [17]                   | 4                    | -                    |
| SPA0045              | P32            | [17]                   | 5                    | -                    |
| Group D              |                |                        |                      |                      |
| SPA0069              | RsmY           | [17,21]                | 205                  | 99                   |
| SPA0072              | tmRNA          | [19]                   | 1643                 | 1595                 |
| SPA0073              | sRNA645        | [18]                   | 4                    | 7                    |
| SPA0075              | 4.5S           | [18,19,50]             | 862                  | 500                  |
| SPA0076 <sup>b</sup> | 4.5S           | [18,19,50]             | -                    | 555                  |
| SPA0082              | PhrS; P20      | [17,19]                | 80                   | 120                  |
| SPA0083              | AmiL           | [19]                   | 28                   | 3                    |
| SPA0085              | RsmZ           | [22]                   | 3494                 | 8491                 |
| SPA0089              | sRNA2315       | [18]                   | 9                    | 4                    |
| SPA0090              | 72/101         | [19]                   | 10                   | 3                    |
| SPA0091              | RnpB; sRNA2510 | [17-19]                | 340                  | 630                  |
| SPA0092              | CrcZ           | [20]                   | 100                  | 120                  |
| SPA0094              | 6S             | [19,51]                | 898                  | 767                  |
| SPA0095              | sRNA1059       | [18]                   | 8                    | 5                    |
| SPA0122              | Spot42         | [31]                   | 36                   | 73                   |

<sup>a</sup> Total number of reads identifying nstSGR.

<sup>b</sup> In PA14 this nstSGR contains a duplication of *ffs* gene for 4.5S between *loci* PA14\_44640 and PA14\_44650.

<sup>c</sup> References [1]-[49] as in main text. [50] Toschka HY, Struck JC, Erdmann VA (1989) The 4.5S RNA gene from *Pseudomonas aeruginosa*. *Nucleic Acids Res* 17: 31-36; [51] Vogel DW, Hartmann RK, Struck JC, Ulbrich N, Erdmann VA (1987) The sequence of the 6S RNA gene of *Pseudomonas aeruginosa*. *Nucleic Acids Res* 15: 4583-4591.
